# Supplementary material for: Profiling of Nutraceuticals and Proximates in Peanut Genotypes Differing for Seed Coat Color and Seed Size
Source: Front Nutr. 2020 Apr 15;7:45. doi: 10.3389/fnut.2020.00045 (PMC7174653; doi:10.3389/fnut.2020.00045)
Supplement: Supplementary file 2 [file Table_2.xlsx]

## Sheet: Supplementary Table 2
Supplementary Table 2: Analysis of variance for nutritional, morphological and yield related traits in sixty peanut genotypes
Sl. No.	Traits	Source of variation			S. Em.	C. D. (5%)	C. D. (1%)	C. V.
		Replication MSS	Genotypes MSS	Environment MSS
	Df	1	59	59
1	MC	2.19	0.03**	0.22	0.33	0.93	1.23	10.79
2	Fat	10.3	18.55**	0.84	0.65	1.83	2.44	2.07
3	CP	5.64	3.17**	0.52	0.51	1.44	1.92	2.63
4	Ash	0.34	0.01**	0.02	0.1	0.29	0.38	5.77
5	CF	1.81	0.87**	0.12	0.25	0.7	0.94	3.22
6	CHO	7.91	3.26**	4.23	1.45	4.11	5.47	19.51
7	TPC	7977.14	122.36**	30.83	3.93	11.11	14.78	1.57
8	AOA	481.08	0.04**	0.08	0.2	0.56	0.75	0.36
9	LL	0.71	0.06**	0.03	0.12	0.33	0.44	3.53
10	LW	0.06	0.01**	0.01	0.08	0.22	0.29	5.1
11	PH	33.9	68.70**	12.12	2.46	6.97	9.27	10.24
12	PWPP	50.44	19.94**	16.61	2.88	8.16	10.85	21.71
13	NPPP	50.88	32.03**	24.58	3.51	9.92	13.2	28.15
14	SP	27.26	0.93**	14.63	2.7	7.65	10.18	6.11
15	TW	84.26	377.54**	26.22	3.62	10.25	13.63	12.01
16	SMKW	1.38	0.06**	0.7	0.59	1.67	2.23	0.88
17	HW	427.29	933.73NS	336.05	12.96	36.68	48.79	30.23
** Signigicant at 1 % level of probability, NS: non-significant
MC: Moisture content, Fat: Fat content, CP: Crude protein content, Ash: Ash content, CF: Crude fibre content, CHO: Carbohydrate content, TPC: Total polyphenol content, AOA: Total antioxidant activity, LL: Leaflet length, LW: Leaflet width, PH: Plant height, PWPP: Pod weight per plant, NPPP: Number of pods per plant, SP: Shelling percentage, TW: Test weight, SMKW: Sound mature kernel weight percen…
