# Supplementary material for: Profiling of Nutraceuticals and Proximates in Peanut Genotypes Differing for Seed Coat Color and Seed Size
Source: Front Nutr. 2020 Apr 15;7:45. doi: 10.3389/fnut.2020.00045 (PMC7174653; doi:10.3389/fnut.2020.00045)
Supplement: Supplementary file 5 [file Table_5.xlsx]

## Sheet: Supplementary Table 5
Supplementary Table 5. Phenotypic correlation coefficients for kernel size, nutritional traits, color parameters, morphological and yield related traits
	Kernel size	MC	Fat	CP	Ash	CF	CHO	TPC	AOA	K/S	RFL	ΔE	L*	a*	b*	ΔL	Δa	Δb	h	C*	LL	LW	PH	SP	NPPP	PWPP	HW	TW	SMKW
Kernel size	1
MC	-0.027	1
Fat	-0.192	-0.077	1
CP	.352**	-0.164	-.619**	1
Ash	-0.196	0.013	0.237	-0.215	1
CF	-0.031	-0.046	0.013	-0.179	-0.042	1
CHO	-0.014	-.281*	-.635**	0.087	-.282*	-.304*	1
TPC	0.033	0.09	0.199	-0.067	0.097	0.217	-.349**	1
AOA	-0.054	-0.073	-0.003	0.047	0.038	-0.199	0.091	0.207	1
K/S	0.047	-0.174	0.214	-.324*	0.124	0.026	0.07	.326*	-0.024	1
RFL	0.02	0.161	-0.132	.257*	-0.029	0.046	-0.159	-.363**	-0.174	-.871**	1
ΔE	0.015	-0.214	.292*	-.384**	0.193	0.13	-0.012	.282*	-0.093	.895**	-.620**	1
L*	-0.061	0.162	-0.2	.332**	-0.182	-0.116	-0.031	-.383**	-0.1	-.894**	.725**	-.924**	1
a*	-0.043	0.066	-0.079	0.165	-0.057	-0.097	-0.017	0.044	.549**	-.631**	.315*	-.629**	.453**	1
b*	-0.063	0.167	-.256*	.370**	-0.199	-0.119	0.004	-.323*	0.054	-.923**	.672**	-.974**	.945**	.650**	1
ΔL	-0.064	0.162	-0.226	.346**	-0.211	-0.133	0	-.363**	-0.073	-.895**	.695**	-.945**	.980**	.500**	.971**	1
Δa	-0.006	0.055	-0.036	0.124	-0.039	-0.127	-0.015	0.035	.533**	-.633**	.331**	-.621**	.460**	.981**	.640**	.499**	1
Δb	-0.039	0.18	-0.206	.328*	-0.175	-0.158	-0.011	-.315*	0.081	-.905**	.668**	-.967**	.952**	.636**	.975**	.968**	.640**	1
h	0.066	-0.182	.280*	-.394**	0.128	0.077	0.033	0.191	-0.092	.891**	-.623**	.913**	-.821**	-.716**	-.927**	-.854**	-.686**	-.881**	1
C*	-0.052	0.156	-0.207	.326*	-0.163	-0.137	-0.01	-0.24	0.178	-.908**	.630**	-.943**	.891**	.786**	.973**	.920**	.783**	.957**	-.922**	1
LL	.260*	-0.089	-0.042	0.084	-0.097	0.099	-0.011	-0.198	-0.147	-0.064	0.156	-0.005	0.038	-0.093	0.039	0.037	-0.058	0.004	0.008	-0.011	1
LW	0.016	-.266*	0.089	-0.207	-0.035	0.124	0.167	-0.026	-0.15	0.063	0.001	0.13	-0.106	-0.042	-0.088	-0.099	-0.005	-0.121	0.131	-0.1	.380**	1
PH	-0.082	-0.155	0.038	-0.242	0.032	.271*	0.102	-0.209	-.294*	0.161	-0.074	0.226	-0.178	-0.253	-0.168	-0.143	-0.246	-0.188	0.156	-0.222	.447**	.345**	1
SP	-0.026	0.183	0.212	-.255*	0.193	0.016	-0.176	0.199	0.062	-0.212	.289*	-0.084	0.125	0.213	0.112	0.131	.259*	0.157	-0.068	0.185	-0.023	0.107	-0.081	1
NPPP	-0.212	0.128	0.169	-0.168	-0.007	-0.121	-0.057	0.037	0.169	-.292*	.312*	-0.191	.265*	0.234	0.223	0.242	.269*	.259*	-0.127	.271*	-0.124	0.097	-.281*	.645**	1
PWPP	-0.021	0.128	-0.166	-0.117	-0.083	0.122	0.185	-0.105	-0.165	-0.118	0.119	-0.054	0.166	-0.083	0.107	0.15	-0.072	0.077	-0.051	0.081	0.143	0.187	0.243	0.099	0.148	1
HW	.897**	-0.062	-0.183	.295*	-0.071	0.068	-0.027	0.08	-0.155	0.035	0.064	0.04	-0.068	-0.1	-0.085	-0.078	-0.05	-0.062	0.054	-0.088	.354**	0.149	0.068	0.04	-0.243	0.023	1
TW	.277*	-0.192	0.072	-0.066	0.134	0.163	-0.025	0.177	.310*	-0.009	-0.006	0.07	-0.123	.298*	-0.051	-0.118	.300*	-0.049	0.011	0.034	0.033	0.113	0.024	.317*	-0.021	0.099	.271*	1
SMKW	0.219	0.063	0.162	-0.015	.267*	-0.073	-0.222	-0.034	0.09	-0.161	.345**	0.031	0.021	0.063	-0.033	-0.029	0.097	0.016	0.009	0.016	-0.194	-0.038	-0.246	.455**	.322*	-0.105	0.232	.266*	1
**. Correlation is significant at the 0.01 level (2-tailed).
*. Correlation is significant at the 0.05 level (2-tailed).
MC: Moisture content, Fat: Fat content, CP: Crude protein content, Ash: Ash content, CF: Crude fibre content, CHO: Carbohydrate content, TPC: Total polyphenol content, AOA: Total antioxidant activity, K/S: Color strength, RFL: Reflectance, ΔE: Color difference between sample and standard colors, L*: Lightness/darkness value, a*: Redness/greenness of the color, b*: Yellowness/blueness of the color…
