# Supplementary material for: Profiling of Nutraceuticals and Proximates in Peanut Genotypes Differing for Seed Coat Color and Seed Size
Source: Front Nutr. 2020 Apr 15;7:45. doi: 10.3389/fnut.2020.00045 (PMC7174653; doi:10.3389/fnut.2020.00045)
Supplement: Supplementary file 6 [file Table_6.xlsx]

## Sheet: Supplementary Table 6
Supplementary Table 6: Major allele frequency, heterozygosity and polymorphic information content of AhTE markers screened on sixty peanut genotypes
	Markers	Major allele frequency	Heterozygosity	Polymorphic information content
1	AhTE0143	0.8	0.32	0.27
2	AhTE0189	0.87	0.23	0.2
3	AhTE0205	0.52	0.5	0.37
4	AhTE0233	0.73	0.38	0.31
5	AhTE0237	0.9	0.19	0.17
6	AhTE0296	0.77	0.36	0.29
7	AhTE0362	0.85	0.26	0.28
8	AhTE0442	0.96	0.07	0.06
9	AhTE0446	0.61	0.47	0.36
10	AhTE0465	0.88	0.21	0.19
11	AhTE0474	0.54	0.5	0.37
12	AhTE1092	0.86	0.24	0.21
13	AhTE1098	0.73	0.4	0.32
14	AhTE1117	0.93	0.13	0.12
15	AhTE1253	0.97	0.05	0.05
16	AhTE1271	0.96	0.07	0.06
17	AhTE1276	0.73	0.39	0.31
18	AhTE1277	0.78	0.35	0.28
19	AhTE1310	0.96	0.08	0.08
20	AhTE1337	0.91	0.17	0.15
21	AhTE1363	0.97	0.05	0.05
22	AhTE1379	0.91	0.16	0.15
23	AhTE1437	0.85	0.24	0.21
24	AhTE1438	0.98	0.03	0.03
25	AhTE1542	0.51	0.5	0.37
26	AhTE1564	0.95	0.08	0.08
27	AhTE1581	0.77	0.36	0.3
28	AhTE1587	0.98	0.03	0.03
29	AhTE1597	0.89	0.19	0.17
30	AhTE1744	0.84	0.26	0.22
31	AhTE1761	0.9	0.17	0.16
32	AhTE1777	0.96	0.07	0.06
33	AhTE1780	0.94	0.1	0.09
34	AhTE1872	0.81	0.31	0.26
35	AhTE1884	0.65	0.45	0.35
36	AhTE1907	0.75	0.38	0.31
37	AhTE1913	0.89	0.19	0.17
38	AhTE1916	0.97	0.05	0.05
39	AhTE2000	0.93	0.12	0.11
40	AhTE2011	0.94	0.1	0.1
41	AhTE2028	0.95	0.1	0.09
	Mean	0.84	0.23	0.19
